# Supplementary material for: Spatio-Temporal Variation in Soil Nutrients and Plant Recovery across a Fire-Severity Gradient in Old-Growth Araucaria-Nothofagus Forests of South-Central Chile
Source: MDPI journal article supplement (doi:10.3390/f13030448), 2022-03-12
Supplement: s1 [file s1]

## SUPPLEMENTARY MATERIAL

**Table S1.** Summary statistics of soil data by year since the 2015 forest fire and across the fire severity gradient evaluated in the study.

| Year | Fire Severity Level | Soil variable | Min. | Mean  | Max.  | SD   |
|------|---------------------|---------------|------|-------|-------|------|
| 2016 | Unburned Forest     | N (mg/kg)     | 25   | 52.3  | 102   | 48   |
|      |                     | P (mg/kg)     | 6    | 10.9  | 17    | 38.3 |
|      |                     | K (mg/kg)     | 39   | 74    | 160   | 51.6 |
|      |                     | SOM (%)       | 3.8  | 7.1   | 10.6  | 33   |
|      | Low                 | N (mg/kg)     | 30   | 61.6  | 117   | 42.5 |
|      |                     | P (mg/kg)     | 5    | 9.4   | 21    | 54.7 |
|      |                     | K (mg/kg)     | 39.1 | 57.8  | 82.1  | 26.8 |
|      |                     | SOM (%)       | 5.6  | 5.8   | 6     | 27.4 |
|      | Moderate            | N (mg/kg)     | 68   | 116.2 | 186   | 30.4 |
|      |                     | P (mg/kg)     | 11   | 17.7  | 26    | 25.8 |
|      |                     | K (mg/kg)     | 46.9 | 92.2  | 129   | 29.7 |
|      |                     | SOM (%)       | 5.2  | 7.1   | 10.5  | 22.4 |
|      | High                | N (mg/kg)     | 21   | 82.2  | 165   | 68.1 |
|      |                     | P (mg/kg)     | 5    | 12.2  | 21    | 45.3 |
|      |                     | K (mg/kg)     | 39.1 | 121.9 | 351.9 | 78.7 |
|      |                     | SOM (%)       | 5.51 | 6.1   | 7.9   | 51.7 |
| 2017 | Low                 | N (mg/kg)     | 12   | 17    | 26    | 22.6 |
|      |                     | P (mg/kg)     | 3    | 13.1  | 49    | 73.8 |
|      |                     | K (mg/kg)     | 23   | 61.5  | 184   | 52.9 |
|      |                     | SOM (%)       | 2.5  | 7.3   | 21.8  | 53.1 |
|      | Moderate            | N (mg/kg)     | 12   | 20.1  | 35    | 18.4 |
|      |                     | P (mg/kg)     | 4    | 13.6  | 32    | 50.2 |
|      |                     | K (mg/kg)     | 31   | 71.9  | 156   | 40.5 |
|      |                     | SOM (%)       | 5.2  | 5.9   | 7.2   | 37.9 |

|      |          |           |     |       |     |       |
|------|----------|-----------|-----|-------|-----|-------|
| 2018 | High     | N (mg/kg) | 16  | 26.1  | 69  | 41.5  |
|      |          | P (mg/kg) | 3   | 11.5  | 24  | 48.1  |
|      |          | K (mg/kg) | 31  | 93.9  | 297 | 65.8  |
|      |          | SOM (%)   | 5.6 | 5.8   | 6.6 | 45.1  |
|      | Low      | N (mg/kg) | 4   | 15.7  | 33  | 43.9  |
|      |          | P (mg/kg) | 2   | 11.9  | 36  | 60.3  |
|      |          | K (mg/kg) | 39  | 73.9  | 172 | 35.3  |
|      |          | SOM (%)   | 2   | 9.2   | 27  | 52.4  |
|      | Moderate | N (mg/kg) | 4   | 16.3  | 36  | 57.7  |
|      |          | P (mg/kg) | 6   | 16.5  | 35  | 40.3  |
|      |          | K (mg/kg) | 55  | 90.1  | 192 | 30.5  |
|      |          | SOM (%)   | 2   | 7.81  | 13  | 35    |
|      | High     | N (mg/kg) | 3   | 13    | 32  | 50.7  |
|      |          | P (mg/kg) | 4   | 17.1  | 110 | 102.4 |
|      |          | K (mg/kg) | 55  | 107.2 | 297 | 57.9  |
|      |          | SOM (%)   | 5   | 9.4   | 24  | 40.8  |
